# Supplementary material
Source: PubMed Central journal article supplement (PMC7670394)
Supplement: jamapediatr-e204768-s002.pdf [file jamapediatr-e204768-s002.pdf]

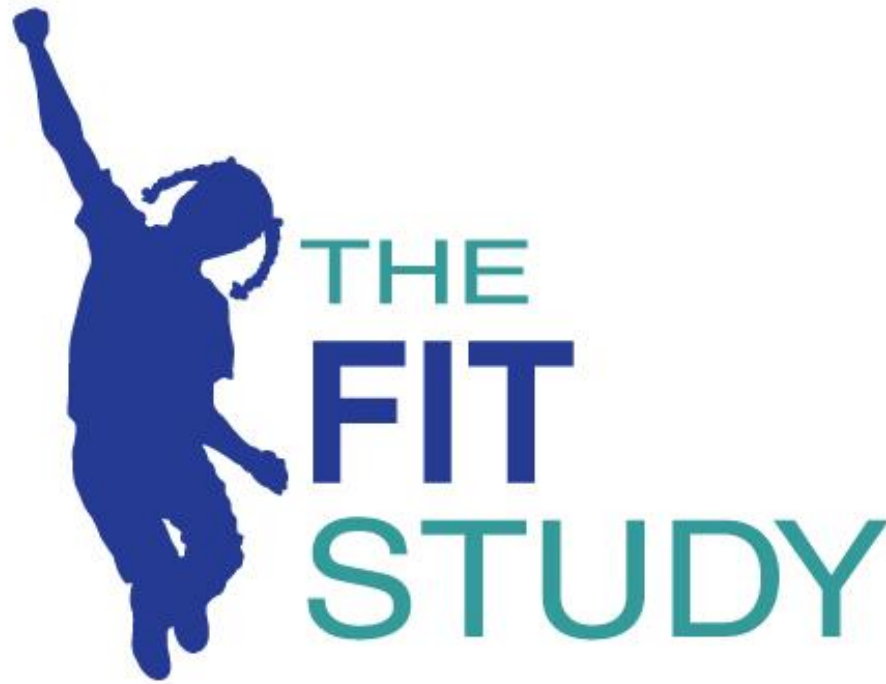

## Operations Manual

University of California, Berkeley  
School of Public Health

---

2 **TABLE OF CONTENTS**

3

4 **TABLE OF CONTENTS.....2**

5 **INTRODUCTION.....3**

6 **BACKGROUND.....3**

7 **FOCUS GROUPS.....4**

8 **STUDY SAMPLE .....5**

9 School District Eligibility and Recruitment.....5

10 School Eligibility and Recruitment .....5

11 Student Eligibility and Recruitment.....7

12 **CONSENT .....7**

13 Parent Consent.....7

14 Student Assent .....8

15 **RANDOMIZATION .....8**

16 Study Design .....8

17 Obtaining a Waiver from CDE.....9

18 **STUDY INCENTIVES.....9**

19 **STUDY MEASURES.....9**

20 Height and Weight (BMI) Measurements .....10

21 Fitness Assessments .....11

22 Student Surveys.....13

23 Parent Surveys.....13

24 Teacher Surveys.....14

25 BMI Validation Study.....14

26 **STUDY INTERVENTION .....15**

27 **STUDY ANALYSES and POWER CALCULATIONS.....16**

28 Aim 1:.....16

29 Aim 2:.....17

30 Aim 3:.....17

31 **TIMELINE OF ACTIVITIES.....19**

32 **AMENDMENTS.....20**

33

34

## 35 INTRODUCTION

36

37 The Fit Study is a three-year, cluster-randomized controlled trial that will evaluate the impact of school-based  
38 body mass index (BMI) screening and reporting on pediatric obesity in California. The study will also evaluate  
39 the impact of BMI screening on stigmatization, weight-based teasing, and body satisfaction among students.  
40 We will enroll 79 elementary and middle schools in California and randomize them to one of three groups: 1)  
41 BMI screening and reporting, 2) BMI screening only, 3) no BMI screening or reporting (control). The Fit Study  
42 has the following 3 specific aims:

- 43 • Aim 1: To prospectively determine the impact of school-based BMI screening and reporting on  
44 pediatric obesity and obesity disparities.
- 45 • Aim 2: To prospectively compare the impact of reporting BMI alone versus reporting BMI with fitness  
46 test results on pediatric obesity and fitness.
- 47 • Aim 3: To determine the extent to which BMI screening and reporting have unintended consequences  
48 on weight-based stigmatization among children and adolescents.

49

## 50 BACKGROUND

51

52 Obesity remains the United States' greatest public health crisis. Disparities in pediatric obesity by  
53 race/ethnicity are increasing, such that significant cost, morbidity, and mortality will be disproportionately  
54 borne by low-income communities and communities of color.<sup>1</sup> While the Institute of Medicine recommends  
55 school-based body mass index (BMI) screening as a tool to address obesity among diverse youth,<sup>2</sup> the Centers  
56 for Disease Control and Prevention do not, citing a lack of evidence to support its effect.<sup>3</sup> We undertook the  
57 first large-scale study to examine the impact of school-based BMI screening and reporting on pediatric obesity  
58 at the population level. Taking advantage of a natural experiment conducted in California, which mandates  
59 annual BMI screening in public schools but makes reporting results to parents optional, we demonstrated that  
60 current methods of school-based BMI reporting had no impact on pediatric obesity.<sup>4</sup> Further analyses  
61 suggested that current reporting methods in California, which report BMI with results from five fitness tests  
62 (mile run or PACER, curl-ups, push-ups, trunk lift, and sit and reach), are unlikely to be understood by parents.  
63 Typically, schools that report child results do so via a letter sent home to parents, but these letters do not  
64 include a weight status classification (e.g., healthy, overweight, obese) or commentary on what parents might  
65 to do improve their child's weight status.<sup>5</sup> Additionally, many letters do not explain what BMI is or that a lower  
66 BMI score is more desirable (in contrast to scores for push-ups, curl-ups, etc.). Without prior knowledge of  
67 BMI, parents may be challenged to decipher meaning from these letters. This study will evaluate the impact of  
68 sending an optimized BMI report to parents on rates of pediatric obesity in California.

69 While BMI screening and reporting may address obesity, numerous experts have raised concerns regarding its  
70 potential to increase weight-based stigmatization.<sup>6-8</sup> Evidence linking BMI screening and reporting to  
71 stigmatization is sparse, but a case report<sup>9</sup> and two small studies<sup>10,11</sup> suggest a causal relationship. Additionally,  
72 parent reports<sup>10,12</sup> and student self-reports<sup>13</sup> suggest unhealthy weight control behaviors increase subsequent  
73 to BMI reports, though no studies have assessed the persistence of these behaviors. This study will provide  
74 robust evidence about the impact of BMI screening on stigmatization, teasing, and weight control behaviors,  
75 thus allowing for truly informed discussions of risks versus benefits with BMI screening and reporting.

76

## 77 FOCUS GROUPS

78

79 In April and May 2014, we will conduct focus groups with parents of elementary and middle school students in  
80 the Bay Area. The purpose of these focus groups will be to obtain feedback regarding the development of an  
81 optimized BMI report. In order to target the parents of overweight youth, we will recruit parents from Bay  
82 Area schools at which more than 50% of students fell outside the Healthy Fitness Zone for body composition  
83 during the 2012-13 school year. We will require that participating parents have a child in elementary or middle  
84 school to match our study population.

85 We will conduct focus groups with each of the following race/ethnic groups: African American, Asian American,  
86 Caucasian, and Latino. Table 1 presents suggested numbers of focus groups for each race/ethnic group based  
87 on the race/ethnic breakdown of students enrolled in our top 12 priority school districts. As a result, we will  
88 conduct 4 focus groups with Latino parents, 2 focus groups with Caucasian parents, 1 focus group with Asian  
89 American parents, and 1 focus group with African American parents. We will conduct two of our Latino focus  
90 groups in Spanish given that views on BMI reports in the Latino community may differ according to level of  
91 acculturation. We will aim to include 8-12 parents in each focus group.

92 **Table 1. Number of focus groups to conduct based on race/ethnicity breakdown in priority school districts.**

| African<br>American | Asian<br>American | Caucasian | Latino |
|---------------------|-------------------|-----------|--------|
| 0.83                | 0.80              | 1.63      | 4.12   |

93 Results are based on race/ethnicity data obtained from DataQuest for the 2012-13 school year.

94 We will use personal contacts at local elementary and middle schools to reach parents who currently have at  
95 least one child in elementary or middle school and who self-identify as African American, Asian American,  
96 Caucasian, or Latino. Our contacts will distribute recruitment fliers among parents and ask them to contact our  
97 focus group coordinator if they are interested in participating. We will hold focus groups during the school day  
98 or during the early evening, depending on parent preference. Focus groups will take place on school premises  
99 (with permission from the school). We will provide parents with food, childcare, and a \$20 gift card to Target.  
100 We will ask parents for 2 hours of their time, though the focus group discussion should only last 1 hour.  
101 Personal contacts who help us coordinate focus groups will receive a \$25 Target gift card as a thank you.

102 During focus groups, the leader will prompt discussion about the following aspects of the BMI reports:

- 103 • Terminology used to define weight categories
- 104 • Inclusion of BMI and height/weight data versus only height/weight data
- 105 • Pictorial representation of student weight status
- 106 • Use of the child's name on the visual weight status scale
- 107 • Physical activity and nutrition resources
- 108 • Presentation of fitness test results

109

110 The focus group leader will also ask parents for general thoughts on how to make the BMI report  
111 understandable and actionable for parents of all literacy levels and socioeconomic strata. If parents have  
112 previously received a report with their child's FITNESSGRAM® results, we will ask for their reactions to  
113 receiving the report.

114

115 Once we have developed final versions of the BMI reports, we will have several Spanish-speaking parents  
116 review the Spanish translation to make sure it is grammatically correct and culturally appropriate.

117

## 118 **STUDY SAMPLE**

### 119 **School District Eligibility and Recruitment**

120 We will select five school districts across California for participation in this study. We will select at least one  
121 district from Southern, Central, and Northern California to achieve geographic representation of schools across  
122 the state. School districts (Table 2, next page) will be eligible to participate in The Fit Study if they meet the  
123 following criteria:

- 124 1. District does not report BMI results to parents and has no history of doing so
- 125 2. District has at least eight schools that meet all of the school-level eligibility criteria (See *Eligibility and*  
126 *Recruitment*)

127

128 We will prioritize enrolling districts that have at least eight schools with over 50% of students eligible for FRPM  
129 and more than 75 students in grades 3 through 8 (See *School Eligibility and Recruitment* for rationale). We will  
130 avoid recruiting districts that require written parent consent for research involving students.<sup>1</sup> We will also  
131 avoid districts with specific research priorities that do not align with our study.<sup>2</sup> Districts that we will prioritize  
132 during recruitment based on the aforementioned factors are bolded and highlighted in Table 2.

133 Our recruitment coordinator will begin recruiting districts by mailing a recruitment letter, district  
134 Memorandum of Understanding (MOU), and study description to superintendents. Our recruitment  
135 coordinator will then follow up with an email and a phone call. When needed, the recruitment coordinator will  
136 visit district offices in-person to speak with the Superintendent. If a school district declines to participate in The  
137 Fit Study, our recruitment coordinator will contact the next school district on the recruitment list. Recruitment  
138 will continue until five schools districts have agreed to participate in the study, with at least one district from  
139 each region of California.

### 140 **School Eligibility and Recruitment**

141 We will enroll 13-19 schools per district, for a total of 79 study schools. Schools will be eligible to participate in  
142 The Fit Study if they meet the following three eligibility criteria:

- 143 • School does not report BMI results to parents and has no history of doing so
- 144 • School has an enrollment of 15% to 85% Latino students
- 145 • School has an enrollment of at least 30 students in grades 3 through 8

146 We will require that schools have an enrollment of 15% to 85% Latino students in order to facilitate analyses of  
147 obesity disparities, which will require a fairly balanced enrollment of Latino and non-Latino youth. To maximize  
148 efficiency in enrollment, we are including a minimum enrollment criterion of 30 students per grade, though we  
149 will prioritize schools with at least 75 students per grade. We will also prioritize schools in which greater than  
150 50% of students are eligible for FRPM in order to target low-income communities with higher rates of obesity-  
151 related health risks. Lastly, to maximize the number of students who we can follow for two years, we will  
152 prioritize the enrollment of K-6, K-8, and 6-8 schools over K-5 and 7-8 schools.

---

<sup>1</sup> We omitted Fresno Unified School District from our list of eligible school districts for this reason.

<sup>2</sup> We omitted Garden Grove Unified School District from our list of eligible school districts for this reason.

153 **Table 2. School districts that do not notify parents of FITNESSGRAM® results and have at least eight schools meeting *The Fit Study* eligibility criteria.**

|                                 | Number of schools meeting 3 required enrollment criteria* | Number of schools meeting 3 req. criteria & >50% FRPM* | Number of schools meeting 3 req. criteria & >75 students per grade* | Number of schools meeting 3 req. criteria, >75 stud, & > 50% FRPM* | Number of K-5 schools <sup>†</sup> | Number of K-6 schools <sup>†</sup> | Number of K-8 schools <sup>†</sup> | Number of 5-8 schools <sup>†</sup> | Number of 6-8 schools <sup>†</sup> |
|---------------------------------|-----------------------------------------------------------|--------------------------------------------------------|---------------------------------------------------------------------|--------------------------------------------------------------------|------------------------------------|------------------------------------|------------------------------------|------------------------------------|------------------------------------|
| <b>NORTHERN</b>                 |                                                           |                                                        |                                                                     |                                                                    |                                    |                                    |                                    |                                    |                                    |
| <b>Lodi Unified</b>             | 23                                                        | 21                                                     | 12                                                                  | 11                                                                 | 2                                  | 28                                 | 2                                  | 0                                  | 0                                  |
| <b>Manteca Unified</b>          | 16                                                        | 13                                                     | 9                                                                   | 7                                                                  | 0                                  | 1                                  | 20                                 | 0                                  | 0                                  |
| <b>Mt. Diablo Unified</b>       | 15                                                        | 8                                                      | 7                                                                   | 4                                                                  | 30                                 | 1                                  | 0                                  | 0                                  | 10                                 |
| Napa Valley Unified             | 12                                                        | 2                                                      | 7                                                                   | 1                                                                  | 17                                 | 2                                  | 0                                  | 0                                  | 5                                  |
| Oak Grove Elementary            | 9                                                         | 2                                                      | 6                                                                   | 2                                                                  | 0                                  | 15                                 | 0                                  | 1                                  | 1                                  |
| <b>Sacramento City Unified</b>  | 41                                                        | 38                                                     | 17                                                                  | 15                                                                 | 0                                  | 49                                 | 11                                 | 2                                  | 0                                  |
| San Jose Unified                | 11                                                        | 2                                                      | 8                                                                   | 1                                                                  | 25                                 | 0                                  | 2                                  | 1                                  | 6                                  |
| <b>Stockton Unified</b>         | 25                                                        | 25                                                     | 9                                                                   | 9                                                                  | 2                                  | 0                                  | 40                                 | 0                                  | 2                                  |
| <b>Twin Rivers Unified</b>      | 31                                                        | 31                                                     | 12                                                                  | 12                                                                 | 0                                  | 24                                 | 4                                  | 1                                  | 2                                  |
| <b>CENTRAL</b>                  |                                                           |                                                        |                                                                     |                                                                    |                                    |                                    |                                    |                                    |                                    |
| Fresno Unified                  | 48                                                        | 44                                                     | 26                                                                  | 25                                                                 | 1                                  | 62                                 | 4                                  | 2                                  | 2                                  |
| <b>Merced City Elementary</b>   | 11                                                        | 10                                                     | 9                                                                   | 8                                                                  | 12                                 | 0                                  | 1                                  | 0                                  | 4                                  |
| <b>Panama Buena-Vista Union</b> | 21                                                        | 16                                                     | 19                                                                  | 14                                                                 | 0                                  | 18                                 | 0                                  | 1                                  | 3                                  |
| <b>Visalia Unified</b>          | 21                                                        | 18                                                     | 14                                                                  | 13                                                                 | 0                                  | 25                                 | 0                                  | 0                                  | 0                                  |
| <b>SOUTHERN</b>                 |                                                           |                                                        |                                                                     |                                                                    |                                    |                                    |                                    |                                    |                                    |
| <b>ABC Unified</b>              | 13                                                        | 9                                                      | 7                                                                   | 3                                                                  | 0                                  | 18                                 | 0                                  | 0                                  | 1                                  |
| Alhambra Unified                | 9                                                         | 8                                                      | 6                                                                   | 5                                                                  | 0                                  | 0                                  | 13                                 | 0                                  | 0                                  |
| Alta Loma Elementary            | 10                                                        | 0                                                      | 7                                                                   | 0                                                                  | 0                                  | 8                                  | 0                                  | 0                                  | 1                                  |
| Apple Valley Unified            | 9                                                         | 9                                                      | 4                                                                   | 4                                                                  | 0                                  | 7                                  | 3                                  | 0                                  | 0                                  |
| Bonita Unified                  | 9                                                         | 2                                                      | 4                                                                   | 1                                                                  | 8                                  | 0                                  | 0                                  | 0                                  | 2                                  |
| Capistrano Unified              | 12                                                        | 4                                                      | 7                                                                   | 2                                                                  | 37                                 | 0                                  | 2                                  | 0                                  | 12                                 |
| Garden Grove Unified            | 26                                                        | 25                                                     | 14                                                                  | 14                                                                 | 0                                  | 41                                 | 3                                  | 0                                  | 2                                  |
| Menifee Union Elementary        | 13                                                        | 2                                                      | 11                                                                  | 2                                                                  | 8                                  | 0                                  | 0                                  | 0                                  | 2                                  |
| <b>Moreno Valley Unified</b>    | 14                                                        | 14                                                     | 13                                                                  | 13                                                                 | 21                                 | 2                                  | 0                                  | 3                                  | 0                                  |
| <b>Pasadena Unified</b>         | 14                                                        | 10                                                     | 7                                                                   | 6                                                                  | 7                                  | 10                                 | 3                                  | 0                                  | 1                                  |
| Saddleback Valley Unified       | 10                                                        | 3                                                      | 6                                                                   | 0                                                                  | 0                                  | 23                                 | 0                                  | 0                                  | 0                                  |
| Westside Union Elementary       | 9                                                         | 3                                                      | 6                                                                   | 1                                                                  | 0                                  | 6                                  | 4                                  | 0                                  | 2                                  |

154 = Priority school district due to large number of schools that meet required & preferred eligibility criteria.

155 \*Based on 2012-13 data obtained from DataQuest; †Based on 2010-11 data obtained from DataQuest.

156 When required, we will submit a research application to district research departments. When we've received a  
 157 signed MOU from a school district, our recruitment coordinator will begin recruiting eligible schools. Our  
 158 recruitment coordinator will first mail a recruitment letter, a school-level MOU, and a study description to  
 159 school principals. She will then follow up with an email and a phone call. If necessary, the recruitment  
 160 coordinator will visit schools in person. If a school declines to participate in the study, our recruitment  
 161 coordinator will select another school from the list of eligible schools. Schools that agree to participate will sign  
 162 the MOU appropriate for their school type.

163 **Student Eligibility and Recruitment**

164 All students in grades 3 through 8 will be eligible to participate in this study. Students will be recruited via an  
 165 information sheet sent home to families (See *Parent consent* for distribution schedule) via the most reliable  
 166 delivery mode (as determined by schools). Delivery modes may include sending the information sheet home in  
 167 a homework folder, emailing it to parents, or mailing it home via US mail. Our research team will translate  
 168 information letters into any languages that schools typically use when sending information home to parents.

169

170 **CONSENT**

171 **Parent Consent**

172 We have obtained a waiver of parent permission from UC Berkeley's Committee for the Protection of Human  
 173 Subjects for this study. However, the study information sheet sent to parents will have an attached opt-out  
 174 form that parents may sign if they DO NOT want their student to participate in the study. While we recognize  
 175 that the opt-out method creates additional work for parents who don't want their child to participate in the  
 176 study, we also recognize that greater levels of stress in many low-income families can make it difficult for  
 177 parents to manage all forms that need to be returned to school. Since there is a strong correlation between  
 178 lower household income and childhood obesity, we worry that requiring parents to return a form for their  
 179 child to participate would result in the systematic exclusion of the students at greatest risk for obesity and  
 180 weight-based stigmatization. Because the study poses minimal risk to students, we have elected to use the  
 181 opt-out method to produce a more representative sample.

182 **Informing parents at intervention schools.** Table 3 depicts the schedule for distributing information sheets  
 183 and opt-out forms to students at intervention schools. In August 2014 (Year 1), parents of 4<sup>th</sup>-7<sup>th</sup> grade  
 184 students will receive information sheets describing all future study activities and opt-out forms. Third grade  
 185 students will receive these forms In January 2015 (Year 1) since they will not participate in the fall 2014 survey.  
 186 In August 2015 (Year 2), we will provide information sheets and opt-out forms to the parents of incoming 6<sup>th</sup>  
 187 grade students at 6-8 schools and 7<sup>th</sup> grade students at 7-8 schools; we will do this for 3<sup>rd</sup> grade students in  
 188 January 2016. We will not enroll any students during Year 3 since those students would only contribute one  
 189 year of data.

190 **Table 3. Distribution of student consent forms for INTERVENTION schools according to school type.**

| School type | August 2014     |                 |                 |                 |                 |                 | January 2015    |                 |                 |                 |                 |                 | August 2015     |                 |                 |                 |                 |                 | January 2016    |                 |                 |                 |                 |                 |
|-------------|-----------------|-----------------|-----------------|-----------------|-----------------|-----------------|-----------------|-----------------|-----------------|-----------------|-----------------|-----------------|-----------------|-----------------|-----------------|-----------------|-----------------|-----------------|-----------------|-----------------|-----------------|-----------------|-----------------|-----------------|
|             | 3 <sup>rd</sup> | 4 <sup>th</sup> | 5 <sup>th</sup> | 6 <sup>th</sup> | 7 <sup>th</sup> | 8 <sup>th</sup> | 3 <sup>rd</sup> | 4 <sup>th</sup> | 5 <sup>th</sup> | 6 <sup>th</sup> | 7 <sup>th</sup> | 8 <sup>th</sup> | 3 <sup>rd</sup> | 4 <sup>th</sup> | 5 <sup>th</sup> | 6 <sup>th</sup> | 7 <sup>th</sup> | 8 <sup>th</sup> | 3 <sup>rd</sup> | 4 <sup>th</sup> | 5 <sup>th</sup> | 6 <sup>th</sup> | 7 <sup>th</sup> | 8 <sup>th</sup> |
| K-5         |                 | ✓               |                 |                 |                 |                 | ✓               |                 |                 |                 |                 |                 |                 | ✓               |                 |                 |                 |                 | ✓               |                 |                 |                 |                 |                 |
| K-6         |                 | ✓               | ✓               |                 |                 |                 | ✓               |                 |                 |                 |                 |                 |                 | ✓               | ✓               |                 |                 |                 | ✓               |                 |                 |                 |                 |                 |
| K-8         |                 | ✓               | ✓               | ✓               | ✓               |                 | ✓               |                 |                 |                 |                 |                 |                 | ✓               | ✓               | ✓               | ✓               | ✓               |                 |                 |                 |                 |                 |                 |
| 6-8         |                 |                 |                 | ✓               | ✓               |                 |                 |                 |                 |                 |                 |                 |                 |                 |                 | ✓               | ✓               |                 |                 |                 |                 |                 |                 |                 |
| 7-8         |                 |                 |                 |                 | ✓               |                 |                 |                 |                 |                 |                 |                 |                 |                 |                 |                 | ✓               |                 |                 |                 |                 |                 |                 |                 |

191  = Consent forms distributed to NEW students only.

192 **Informing parents at control schools.** Table 4 depicts the schedule for distributing information sheets and  
 193 opt-out forms to students at control schools. In August 2014 (Year 1), parents of all 4<sup>th</sup>-7<sup>th</sup> grade students will  
 194 receive information sheets describing all future study activities and opt-out forms. In August 2015 (Year 2) and  
 195 August 2016 (Year 3), we will provide information sheets and opt-out forms to the parents of incoming 4<sup>th</sup>  
 196 grade students at K-5, K-6, and K-8 schools. We will enroll 4<sup>th</sup> grade students at control schools in Year 3 to  
 197 increase our power for a cross-sectional comparison of BMI among students who had their BMI measured for  
 198 two school years (Groups 1 and 2) versus those who did not (Group 3). Third grade students at control schools  
 199 will not participate in the study.

200 **Table 4. Distribution of student consent forms for CONTROL schools according to school type.**

| School type | August 2014     |                 |                 |                 |                 | August 2015*    |                 |                 |                 |                 | August 2016     |                 |                 |                 |                 |
|-------------|-----------------|-----------------|-----------------|-----------------|-----------------|-----------------|-----------------|-----------------|-----------------|-----------------|-----------------|-----------------|-----------------|-----------------|-----------------|
|             | 4 <sup>th</sup> | 5 <sup>th</sup> | 6 <sup>th</sup> | 7 <sup>th</sup> | 8 <sup>th</sup> | 4 <sup>th</sup> | 5 <sup>th</sup> | 6 <sup>th</sup> | 7 <sup>th</sup> | 8 <sup>th</sup> | 4 <sup>th</sup> | 5 <sup>th</sup> | 6 <sup>th</sup> | 7 <sup>th</sup> | 8 <sup>th</sup> |
| K-5         | ✓               |                 |                 |                 |                 | ✓               |                 |                 |                 |                 | ✓               |                 |                 |                 |                 |
| K-6         | ✓               | ✓               |                 |                 |                 | ✓               |                 |                 |                 |                 | ✓               |                 |                 |                 |                 |
| K-8         | ✓               | ✓               | ✓               | ✓               |                 | ✓               |                 |                 |                 |                 | ✓               |                 |                 |                 |                 |
| 6-8         |                 |                 | ✓               | ✓               |                 |                 |                 |                 |                 |                 |                 |                 |                 |                 |                 |
| 7-8         |                 |                 |                 | ✓               |                 |                 |                 |                 |                 |                 |                 |                 |                 |                 |                 |

201 \*We did not enroll new students in grades 5-7 in August 2015 at control schools.

202 **Student Assent**

203 Using the student survey script, we will obtain verbal assent from students prior to their participation in the  
 204 student survey, excluding those whose parents signed an opt-out form. We have obtained a waiver of verbal  
 205 assent for student participation in height, weight, and fitness assessments, given that they are already  
 206 required in California public schools. If we sought verbal assent for the height and weight measurements,  
 207 overweight children may selectively decline to participate, impairing our ability to assess the impact of BMI  
 208 reporting on the youth most in need.

209

210 **RANDOMIZATION**

211 Randomization will take place in Fall 2014 after schools are recruited. We will do stratified random sampling  
 212 based on school type (elementary vs. non-elementary), allowing us to achieve a balanced distribution of  
 213 students from each grade level in each group. Professor Chuck McCulloch, the study's biostatistcian, will  
 214 provide an Excel spreadsheet that uses a random number generator to allocate schools to the study arms using  
 215 a random number generator.

216 **Study Design**

217 **School randomization.** The Fit Study is a cluster-randomized controlled trial. We will randomize 79  
 218 elementary and middle schools in California to one of three groups (27 schools in Groups 1 and 2; 25 schools in  
 219 Group 3):

- 220 • Group 1: BMI screening and reporting
  - 221 ○ Students in 3<sup>rd</sup>-8<sup>th</sup> grade will have their heights and weights measured and their BMIs
  - 222 calculated annually. Parents will receive a report with their students' BMI results (and possibly
  - 223 fitness test results).
- 224 • Group 2: BMI screening only
  - 225 ○ Students in 3<sup>rd</sup>-8<sup>th</sup> grade will have their heights and weights measured and their BMIs
  - 226 calculated annually. Parents will not receive reports with their students' BMI results.
- 227 • Group 3: No BMI screening or reporting (Control)



- 228                   ○ Students in 3<sup>rd</sup>-8<sup>th</sup> grade will not have their heights and weights measured during the 2014-15  
229                   and 2015-16 school years.

230 **Student randomization.** We will further randomize 5<sup>th</sup>-8<sup>th</sup> grade students at Group 1 schools such that their  
231 parents receive either a BMI-only or BMI+fitness report. This randomization will not apply to 3<sup>rd</sup> and 4<sup>th</sup> grade  
232 students since they will not participate in the fitness tests.

### 233 **Obtaining a Waiver from CDE**

234 In Fall 2014, we will apply for a waiver that will exempt our 25 control schools from conducting state-  
235 mandated height and weight measurements on their 5<sup>th</sup> and 7<sup>th</sup> grade students during the 2014-15 and 2015-  
236 16 school years. This process will involve obtaining approval from each district's school board and teachers'  
237 union president. School board meetings that discuss the waiver approval must be advertised in the local  
238 newspaper so that community members have the opportunity to make a public comment. The waiver process  
239 will also involve obtaining approval from each school site council. Once these approvals have been obtained  
240 for all control schools in a given district, a waiver should be submitted via the CDE's online waiver portal, found  
241 here: <http://www.cde.ca.gov/re/lr/wr/submit.asp>. Christine Gordon-Plumb may be contacted for questions  
242 regarding the waiver submission process: (916) 319-0823 or cgordon@cde.ca.gov.

## 243 **STUDY INCENTIVES**

244 **Schools.** Schools will receive a \$500 cash stipend annually for their participation in The Fit Study. Schools will  
245 also receive a Tanita BWB 800S electronic scale, ShorrBoard stadiometer, and laminated instructional cards to  
246 use when conducting height and weight measurements. Intervention schools will receive this equipment in  
247 January 2015; control schools will receive this equipment in January 2017.

248 **Teachers/School staff.** Teachers (or other participating school staff) will receive a \$25 gift card to  
249 Amazon.com or Target when they conduct height and weight measurements with a classroom of students.  
250 Additionally, classroom teachers will receive a \$25 gift card to Amazon.com or Target each time our research  
251 team visits a classroom to administer the student survey. Teachers with multiple classes can receive up to 24  
252 gift cards (\$600) per assessment period. If they are allotted more than 24 gift cards, they can use the  
253 remaining funds to purchase PE equipment or they can receive the funds as taxable income (per UC Berkeley  
254 policy).

255 **School contact person.** During each year of the study, one person at all intervention schools will receive a  
256 \$100 gift card to Amazon.com or Target for being our point of contact for the study. This individual will help us  
257 schedule the fall student survey, communicate with teachers about spring assessments, and obtain school-  
258 level data for us when needed. The point person at control schools will receive a \$50 gift card to Amazon.com  
259 or Target during the 2014-15 and 2015-16 school years, when no height and weight measurements are  
260 conducted. During the 2016-17 school year, when 4<sup>th</sup>-8<sup>th</sup> grade students at control schools participate in height  
261 and weight measurements, this person will receive a \$100 gift card to Amazon.com or Target. As we have done  
262 in other school-based studies, we will work with school principals to identify the best individual to assume this  
263 role at each school.

264 **Students.** Students will not receive incentives for their participation in the study.

265 **Parents.** Parents who are mailed a parent survey (See *Study Measures*) will receive a \$1 bill (included with the  
266 survey) to incentivize them to complete and return the survey.

267

## 268 **STUDY MEASURES**

269 Table 5 illustrates data collection activities for students based on the grades in which they will participate.

270 **Table 5. Student involvement in study procedures by year, according to grade cohort.**

| Cohort                                           | 2014-2015             |              | 2015-2016             |                | 2016-2017             |               |
|--------------------------------------------------|-----------------------|--------------|-----------------------|----------------|-----------------------|---------------|
|                                                  | Fall                  | Spring       | Fall                  | Spring         | Fall                  | Spring        |
| <b>3<sup>rd</sup> &amp; 4<sup>th</sup> grade</b> |                       |              | 3 <sup>rd</sup> grade |                | 4 <sup>th</sup> grade |               |
| Group 1                                          |                       |              |                       | BMI            | Survey                | BMI*          |
| Group 2                                          |                       |              |                       | BMI            | Survey                | BMI*          |
| Group 3                                          |                       |              |                       |                | Survey                | BMI*          |
| <b>3<sup>rd</sup> - 5<sup>th</sup> grade</b>     | 3 <sup>rd</sup> grade |              | 4 <sup>th</sup> grade |                | 5 <sup>th</sup> grade |               |
| Group 1                                          |                       | BMI          | Survey                | BMI            | Survey                | BMI*+fitness° |
| Group 2                                          |                       | BMI          | Survey                | BMI            | Survey                | BMI*+fitness° |
| Group 3                                          |                       |              | Survey                |                | Survey                | BMI*+fitness° |
| <b>4<sup>th</sup> - 6<sup>th</sup> grade</b>     | 4 <sup>rd</sup> grade |              | 5 <sup>th</sup> grade |                | 6 <sup>th</sup> grade |               |
| Group 1                                          | Survey                | BMI          | Survey                | BMI + fitness  | Survey                | BMI* + AC     |
| Group 2                                          | Survey                | BMI          | Survey                | BMI + fitness  | Survey                | BMI* + AC     |
| Group 3                                          | Survey                |              | Survey                | Fitness only** | Survey                | BMI* + AC     |
| <b>5<sup>th</sup> - 7<sup>th</sup> grade</b>     | 5 <sup>th</sup> grade |              | 6 <sup>th</sup> grade |                | 7 <sup>th</sup> grade |               |
| Group 1                                          | Survey                | BMI+fitness  | Survey                | BMI*+fitness   | Survey                | BMI+fitness   |
| Group 2                                          | Survey                | BMI+fitness  | Survey                | BMI*+fitness   | Survey                | BMI+fitness   |
| Group 3                                          | Survey                | Fitness only | Survey                |                | Survey                | BMI+fitness   |
| <b>6<sup>th</sup> - 8<sup>th</sup> grade</b>     | 6 <sup>rd</sup> grade |              | 7 <sup>th</sup> grade |                | 8 <sup>th</sup> grade |               |
| Group 1                                          | Survey                | BMI+fitness  | Survey                | BMI*+fitness   | Survey                | BMI* + AC     |
| Group 2                                          | Survey                | BMI+fitness  | Survey                | BMI*+fitness   | Survey                | BMI* + AC     |
| Group 3                                          | Survey                |              | Survey                | Fitness only** | Survey                | BMI* + AC     |
| <b>7<sup>th</sup> &amp; 8<sup>th</sup> grade</b> | 7 <sup>th</sup> grade |              | 8 <sup>th</sup> grade |                |                       |               |
| Group 1                                          | Survey                | BMI+fitness  | Survey                | BMI*+fitness   |                       |               |
| Group 2                                          | Survey                | BMI+fitness  | Survey                | BMI*+fitness   |                       |               |
| Group 3                                          | Survey                | Fitness only | Survey                |                |                       |               |

271 BMI: Student BMI assessed by school staff; BMI+fitness: full FITNESSGRAM® test administered by PE teachers; Fitness only: 5 fitness  
 272 assessments of FITNESSGRAM® test completed (not BMI); AC: aerobic capacity test (one-mile run or PACER).

273 Survey: Survey completed by students and proctored by the research team.

274 \* About 10 students per grade at 4 intervention schools will have their heights and weights measured by school staff AND the research  
 275 team as part of the BMI validation study.

276 \*\* We will not collect these fitness data from control schools.

277 °Fitness data will be collected for students at K-6 and K-8 schools only, not students at K-5 schools.

278 **Height and Weight (BMI) Measurements**

279 *Schedule at intervention schools.* Each spring, 3<sup>rd</sup>-8<sup>th</sup> grade students at intervention schools (Groups 1 and  
 280 2) will have their heights and weights measured by school personnel (i.e., classroom teachers, PE teachers,  
 281 school nurses, etc.). Measurements will take place in February - April to coincide with California’s mandated  
 282 FITNESSGRAM® assessments, which are required for students in 5<sup>th</sup>, 7<sup>th</sup>, and 9<sup>th</sup> grades. Table 6 depicts the  
 283 grade levels that will participate in height and weight measurements during each year of the study according  
 284 to school type. During Year 1, only students who are expected to complete an additional year at their school  
 285 will participate in height and weight measurements. Additionally, only students with data during Year 2 will  
 286 participate in height and weight measurements during Year 3.

287 *Schedule at control schools.* In Year 3 only, 4<sup>th</sup>-8<sup>th</sup> grade students at control schools (Group 3) will have their  
 288 heights and weights measured by school personnel. The grades included in these measurements will match the  
 289 grades participating in height and weight measurements at intervention schools during Year 3. By measuring  
 290 the heights and weights of students in Group 3 schools during Year 3, we will be able to conduct a cross-

291 sectional comparison of BMI data from Group 3 schools with BMI data from Group 2 schools. This will allow us  
 292 to explore the impact of BMI assessments alone (not including reporting) on student weight status.

293 **Table 6. Height and weight measurement schedule by study year and school type.**

| School type                                  | 2014-2015       |                 |                 |                 |                 |                 | 2015-2016       |                 |                 |                 |                 |                 | 2016-2017       |                 |                 |                 |                 |                 |
|----------------------------------------------|-----------------|-----------------|-----------------|-----------------|-----------------|-----------------|-----------------|-----------------|-----------------|-----------------|-----------------|-----------------|-----------------|-----------------|-----------------|-----------------|-----------------|-----------------|
|                                              | 3 <sup>rd</sup> | 4 <sup>th</sup> | 5 <sup>th</sup> | 6 <sup>th</sup> | 7 <sup>th</sup> | 8 <sup>th</sup> | 3 <sup>rd</sup> | 4 <sup>th</sup> | 5 <sup>th</sup> | 6 <sup>th</sup> | 7 <sup>th</sup> | 8 <sup>th</sup> | 3 <sup>rd</sup> | 4 <sup>th</sup> | 5 <sup>th</sup> | 6 <sup>th</sup> | 7 <sup>th</sup> | 8 <sup>th</sup> |
| <b>Intervention Schools (Groups 1 and 2)</b> |                 |                 |                 |                 |                 |                 |                 |                 |                 |                 |                 |                 |                 |                 |                 |                 |                 |                 |
| K-5                                          | ✓               | ✓               |                 |                 |                 |                 | ✓               | ✓               | ✓               |                 |                 |                 |                 | ✓               | ✓               |                 |                 |                 |
| K-6                                          | ✓               | ✓               | ✓               |                 |                 |                 | ✓               | ✓               | ✓               | ✓               |                 |                 |                 | ✓               | ✓               | ✓               |                 |                 |
| K-8                                          | ✓               | ✓               | ✓               | ✓               | ✓               |                 | ✓               | ✓               | ✓               | ✓               | ✓               | ✓               |                 | ✓               | ✓               | ✓               | ✓               | ✓               |
| 6-8                                          |                 |                 |                 | ✓               | ✓               |                 |                 |                 |                 | ✓               | ✓               | ✓               |                 |                 |                 |                 | ✓               | ✓               |
| 7-8                                          |                 |                 |                 |                 | ✓               |                 |                 |                 |                 |                 | ✓               | ✓               |                 |                 |                 |                 |                 | ✓               |
| <b>Control Schools (Group 3)</b>             |                 |                 |                 |                 |                 |                 |                 |                 |                 |                 |                 |                 |                 |                 |                 |                 |                 |                 |
| K-5                                          |                 |                 |                 |                 |                 |                 |                 |                 |                 |                 |                 |                 |                 | ✓               | ✓               |                 |                 |                 |
| K-6                                          |                 |                 |                 |                 |                 |                 |                 |                 |                 |                 |                 |                 |                 | ✓               | ✓               | ✓               |                 |                 |
| K-8                                          |                 |                 |                 |                 |                 |                 |                 |                 |                 |                 |                 |                 |                 | ✓               | ✓               | ✓               | ✓               | ✓               |
| 6-8                                          |                 |                 |                 |                 |                 |                 |                 |                 |                 |                 |                 |                 |                 |                 |                 |                 | ✓               | ✓               |
| 7-8                                          |                 |                 |                 |                 |                 |                 |                 |                 |                 |                 |                 |                 |                 |                 |                 |                 |                 | ✓               |

294

295 **Assessment protocol.** School personnel (i.e., classroom teachers, PE teachers, school nurses, etc.) will  
 296 conduct all height and weight measurements with their students. It is important that school staff conduct  
 297 these measurements rather than research staff since we want to evaluate the impact of school-based BMI  
 298 screening practices as they would typically occur. Despite training, school staff may not protect privacy as well  
 299 as researchers, which might play a role in unintended harms. As stated in *Study Incentives*, schools will receive  
 300 one Tanita BWB 800S scale and one ShorrBoard stadiometer to use when conducting height and weight  
 301 measurements. Additionally, we will provide schools with laminated cards that provide instructions on how to  
 302 conduct accurate height and weight measurements. Intervention schools will receive this equipment in  
 303 January 2015; control schools will receive this equipment in January 2017. We expect that height and weight  
 304 measurements will take 30-45 minutes per class, depending on the number of students.

305 **School staff training.** School personnel who conduct height and weight measurements will watch a 10-  
 306 minute training video on how to accurately measure height and weight. Teachers will watch this video prior to  
 307 conducting height and weight measurements, and we will require that each teacher watch this video at least  
 308 once (returning teachers will be encouraged but not required to watch the video). The video will be available  
 309 on our study website, and it will be imbedded in a Qualtrics survey, which will allow us to track which teachers  
 310 watch the video. The video, developed by our research staff, will train school personnel to collect height to the  
 311 nearest 0.1 cm and weight to the nearest 0.1 kg using a protocol adapted from NHANES that has been used in  
 312 prior studies. At the end of the video, teachers will complete several review questions to ensure that they  
 313 correctly understood the information presented in the video.

314 **Fitness Assessments**

315 **Schedule at intervention schools.** Each year, 5<sup>th</sup>-8<sup>th</sup> grade students at intervention schools will participate in  
 316 the five fitness assessments that, in addition to body composition, comprise the FITNESSGRAM® test. Table 7  
 317 depicts the grade levels that will participate in fitness assessments during each year of the study according to  
 318 school type. Assessments will take place in February and March to coincide with California’s mandated  
 319 FITNESSGRAM® assessments, which are required for students in 5<sup>th</sup>, 7<sup>th</sup>, and 9<sup>th</sup> grades. Only students with at  
 320 least one year remaining at their school will participate in fitness assessments during Year 1. Additionally, only  
 321 students with data during Year 2 will participate in fitness assessments during Year 3.

322

323 Third and 4<sup>th</sup> grade students will not participate in fitness assessments due to the fact that 3<sup>rd</sup> and 4<sup>th</sup> grade  
 324 teachers do not typically conduct the FITNESSGRAM® test and doing so would add significant burden.  
 325 Additionally, FITNESSGRAM® Healthy Fitness Zones do not exist for students under 10 years old. Although 6<sup>th</sup>  
 326 and 8<sup>th</sup> grade students also do not typically participate in the FITNESSGRAM® test, middle school PE teachers  
 327 have experience administering the test and therefore adding one grade will likely not pose a significant burden.

328 **Schedule at control schools.** Each year, 5<sup>th</sup> and 7<sup>th</sup> grade students at control schools will participate in the  
 329 FITNESSGRAM®'s five fitness assessments as required by California Education Code 60800. During the 2014-15  
 330 and 2015-16 school years, 5<sup>th</sup> and 7<sup>th</sup> grade students will abstain from participating in the body composition  
 331 assessment (i.e., height and weight measurements).

332 **Table 7. Fitness assessment schedule by study year and school type.**

| School type                                  | 2014-2015       |                 |                 |                 |                 |                 | 2015-2016       |                 |                 |                 |                 |                 | 2016-2017       |                 |                 |                 |                 |                 |
|----------------------------------------------|-----------------|-----------------|-----------------|-----------------|-----------------|-----------------|-----------------|-----------------|-----------------|-----------------|-----------------|-----------------|-----------------|-----------------|-----------------|-----------------|-----------------|-----------------|
|                                              | 3 <sup>rd</sup> | 4 <sup>th</sup> | 5 <sup>th</sup> | 6 <sup>th</sup> | 7 <sup>th</sup> | 8 <sup>th</sup> | 3 <sup>rd</sup> | 4 <sup>th</sup> | 5 <sup>th</sup> | 6 <sup>th</sup> | 7 <sup>th</sup> | 8 <sup>th</sup> | 3 <sup>rd</sup> | 4 <sup>th</sup> | 5 <sup>th</sup> | 6 <sup>th</sup> | 7 <sup>th</sup> | 8 <sup>th</sup> |
| <b>Intervention Schools (Groups 1 and 2)</b> |                 |                 |                 |                 |                 |                 |                 |                 |                 |                 |                 |                 |                 |                 |                 |                 |                 |                 |
| K-5                                          |                 |                 | ✓               |                 |                 |                 |                 |                 | ✓               |                 |                 |                 |                 |                 | ✓               |                 |                 |                 |
| K-6                                          |                 |                 | ✓               |                 |                 |                 |                 | ✓               | ✓               |                 |                 |                 |                 | ✓               | AC              |                 |                 |                 |
| K-8                                          |                 |                 | ✓               | ✓               | ✓               |                 |                 | ✓               | ✓               | ✓               | ✓               |                 |                 | ✓               | AC              | ✓               | AC              |                 |
| 6-8                                          |                 |                 |                 | ✓               | ✓               |                 |                 |                 | ✓               | ✓               | ✓               |                 |                 |                 |                 |                 | ✓               | AC              |
| 7-8                                          |                 |                 |                 |                 | ✓               |                 |                 |                 |                 | ✓               | ✓               |                 |                 |                 |                 |                 | ✓               | AC              |
| <b>Control Schools (Group 3)</b>             |                 |                 |                 |                 |                 |                 |                 |                 |                 |                 |                 |                 |                 |                 |                 |                 |                 |                 |
| K-5                                          |                 |                 | ✓               |                 |                 |                 |                 |                 | ✓               |                 |                 |                 |                 |                 | ✓               |                 |                 |                 |
| K-6                                          |                 |                 | ✓               |                 |                 |                 |                 |                 | ✓               |                 |                 |                 |                 |                 | ✓               | AC              |                 |                 |
| K-8                                          |                 |                 | ✓               |                 | ✓               |                 |                 |                 | ✓               |                 | ✓               |                 |                 |                 | ✓               | AC              | ✓               | AC              |
| 6-8                                          |                 |                 |                 |                 | ✓               |                 |                 |                 |                 |                 | ✓               |                 |                 |                 |                 |                 | ✓               | AC              |
| 7-8                                          |                 |                 |                 |                 | ✓               |                 |                 |                 |                 |                 | ✓               |                 |                 |                 |                 |                 | ✓               | AC              |

333  = Data NOT collected by UC Berkeley

334 AC = aerobic capacity test only (one-mile run or PACER)

335 **Assessment protocol.** School personnel (likely PE teachers) will conduct all fitness assessments. Schools will  
 336 have the option of conducting the one-mile run or PACER test for aerobic capacity. If control schools conduct  
 337 the one-mile run with their students, mile times will need to be converted to PACER scores for submission to  
 338 the San Joaquin County Office of Education (SJOE) for the Physical Fitness Test. SJOE requires the PACER test  
 339 to calculate VO2max when height and weight are not measured. We expect that fitness assessments will take  
 340 2-4 hours to complete for each class. Teachers will likely conduct fitness assessments over several days.

341 **School staff training.** School personnel who conduct fitness assessments will be asked to watch training  
 342 videos created by the California Department of Education on how to administer the tests accurately. Teachers  
 343 will be asked to watch these videos prior to each assessment period. We will only ask teachers at control  
 344 schools to watch the videos during Year 3 since we will not collect FITNESSGRAM® data for 5<sup>th</sup> and 7<sup>th</sup> grade  
 345 students at control schools during Years 1 and 2. The videos will last no more than 50 minutes in total and will  
 346 be available on our study website for teachers to watch whenever they choose.

347

348 **Student Surveys**

349 Each fall, 4<sup>th</sup>-8<sup>th</sup> grade students at all study schools will complete a student survey. This survey will assess the  
 350 following constructs related to weight stigmatization and its consequences: peer teasing and weight comments,  
 351 parent teasing and weight focus, body satisfaction, and weight control behaviors. Students will complete the  
 352 same survey each year, and the survey will not differ by study group. Table 8 depicts the grades that will  
 353 complete this survey each year according to school type. During Year 1, only 4<sup>th</sup>-7<sup>th</sup> grade students will  
 354 complete the survey given that 8<sup>th</sup> grade students will leave their schools after Year 1. All enrolled 4<sup>th</sup>-8<sup>th</sup> grade  
 355 students will complete the survey during Years 2 and 3. Research staff will travel to schools to administer these  
 356 surveys to students. A member of the research team will explain the survey to students using a prepared script  
 357 before distributing surveys. Students will then complete the survey on their own, raising their hands if they  
 358 have any questions. Three to four research staff members will be present to answer any questions that  
 359 students have. All students will complete the surveys on paper. Third grade students will not complete the  
 360 student survey due to the questionable validity of survey responses from children younger than 9 years old.  
 361 We will pilot test the student survey with students in grades 4-8 prior to administration to ensure that all  
 362 questions are understood correctly.

363 **Table 8. Student survey administration schedule by study year and school type.**

| School type | 2014-2015       |                 |                 |                 |                 |                 | 2015-2016       |                 |                 |                 |                 |                 | 2016-2017       |                 |                 |                 |                 |                 |
|-------------|-----------------|-----------------|-----------------|-----------------|-----------------|-----------------|-----------------|-----------------|-----------------|-----------------|-----------------|-----------------|-----------------|-----------------|-----------------|-----------------|-----------------|-----------------|
|             | 3 <sup>rd</sup> | 4 <sup>th</sup> | 5 <sup>th</sup> | 6 <sup>th</sup> | 7 <sup>th</sup> | 8 <sup>th</sup> | 3 <sup>rd</sup> | 4 <sup>th</sup> | 5 <sup>th</sup> | 6 <sup>th</sup> | 7 <sup>th</sup> | 8 <sup>th</sup> | 3 <sup>rd</sup> | 4 <sup>th</sup> | 5 <sup>th</sup> | 6 <sup>th</sup> | 7 <sup>th</sup> | 8 <sup>th</sup> |
| K-5         |                 | ✓               |                 |                 |                 |                 |                 | ✓               | ✓               |                 |                 |                 |                 | ✓               | ✓               |                 |                 |                 |
| K-6         |                 | ✓               | ✓               |                 |                 |                 |                 | ✓               | ✓               | ✓               |                 |                 |                 | ✓               | ✓               | ✓               |                 |                 |
| K-8         |                 | ✓               | ✓               | ✓               | ✓               |                 |                 | ✓               | ✓               | ✓               | ✓               | ✓               |                 | ✓               | ✓               | ✓               | ✓               | ✓               |
| 5-8         |                 |                 | ✓               | ✓               | ✓               |                 |                 |                 | ✓               | ✓               | ✓               | ✓               |                 |                 |                 | ✓               | ✓               | ✓               |
| 6-8         |                 |                 |                 | ✓               | ✓               |                 |                 |                 |                 | ✓               | ✓               | ✓               |                 |                 |                 |                 | ✓               | ✓               |
| 7-8         |                 |                 |                 |                 | ✓               |                 |                 |                 |                 |                 | ✓               | ✓               |                 |                 |                 |                 |                 | ✓               |

364

365 The student survey will assess parent teasing and focus on weight using a 3-item subscale developed by Kluck  
 366 et al, which asks how often mothers and fathers criticize weight or size, tease about weight or size, and  
 367 encourage weight control behaviors. We will assess body satisfaction using several items from Pingitore’s 10-  
 368 item *Body Satisfaction* scale, as adapted for Dr. Neumark-Sztainer’s *Project Eat*. Weight control behaviors, such  
 369 as dieting, fasting, and skipping meals, as well as perceived weight status, will also be assessed using items  
 370 developed for Dr. Neumark-Sztainer’s *Project Eat*. Questions developed by our research team will assess peer  
 371 teasing.

372 In addition to questions related to weight stigmatization, the survey will include several questions regarding  
 373 students’ experiences having their heights and weights measured at school. An initial question will ask  
 374 students if they remember having their height and weight measured during the previous school year. If  
 375 students respond yes, they will be asked how privacy was maintained during height and weight measures, the  
 376 setting in which measures occurred (classroom, gym, office), and the staff person who conducted the  
 377 measures (school nurse, PE teacher, classroom teacher). The survey will also include several questions about  
 378 food availability at home and demographic questions (grade, sex, race/ethnic group).

379 **Parent Surveys**

380 In Spring 2015 and 2016, we will mail a parent survey to a subsample of parents from all study groups. The  
 381 parent survey will assess parent behaviors related to students’ physical activity and nutrition, parent  
 382 recognition of child weight status, and parent reactions to the BMI report. To examine parents’ behaviors  
 383 related to their child’s diet and exercise, we will use items from the limit setting, monitoring, and  
 384 reinforcement subscales from the Parenting Strategies for Eating and Activity Scale. These 15 Likert-scale items

385 have been tested with English- and Spanish-speaking parents with high reliability and good construct validity.  
386 As part of a process evaluation, the survey will also assess parent perceptions of their child's weight status and  
387 recollection of receiving a BMI report. Subsequent questions will determine how useful and likeable parents  
388 find each report format.

389 Each year, we will mail the parent survey to 60 parents at each Group 1 school and 30 parents at each Group 2  
390 and 3 school (3,030 in Spring 2015 and 3,060 in Spring 2016). In Spring 2016, selected parents will include all  
391 those who returned a survey during the previous year, provided that their child is still participating in the study.  
392 We will randomly select remaining parents. When choosing parents to receive the survey, we will stratify by  
393 weight status such that 2/3 of parents selected have a child who is at risk for overweight or overweight. We  
394 will also stratify by grade so that we have an even distribution across grades. We are conservatively assuming a  
395 45% survey return rate based on recent studies, for an ultimate sample of 1,364 parents in Spring 2015 and  
396 1,377 parents in Spring 2016. To maximize parent response rates, we will send a pre-notification post-card  
397 (sent one week prior to initial survey) and one reminder survey (sent three weeks after initial survey),  
398 techniques that have yielded greater than 60% response rates to mailed surveys. We will also include a \$1 bill  
399 in each survey to incentivize participation. A self-addressed, stamped, return envelope will accompany each  
400 survey packet. The front page of the survey will explain the survey's purpose. The front page will also explain  
401 that parents may take the survey online if they prefer. The survey will be translated into any languages  
402 typically used by schools for materials mailed to parents. We will mail surveys to parents using home  
403 addresses provided by each district.

404 By administering the parent survey prior to sending home BMI reports, we will establish a baseline of  
405 responses against which to compare Year 2 parent survey responses. Each survey will be labeled with the  
406 unique identifier of the parent's student, which will allow us to compare individual parent responses to change  
407 in student BMI. We will not ask parents to record their names or any other identifying information.

408 In Spring 2017, we will send a one-page survey home to all parents of Group 1 students asking if they received  
409 a BMI letter in Fall 2016. The purpose of this survey will be to assess receipt of the BMI letter among parents  
410 who were mailed one. Since some parents may never have seen the letter, either because it was not delivered  
411 to the address where they live or because they never opened it, this will allow us to conduct sensitivity  
412 analyses with parents who we know received and opened the letter. For parents who indicate that they  
413 received the letter, the survey will ask parents to recall their child's weight status from the letter. The survey  
414 will also ask about parent behaviors in response to the letter. To maximize parent response rates, we will send  
415 a pre-notification post-card and one reminder survey. We will also include a \$1 bill in each parent survey.  
416 Parents will be able to take the survey online if they prefer.

## 417 **Teacher Surveys**

418 Each spring, we will ask teachers who conduct height and weight measurements with their students to  
419 complete a 5-minute online survey regarding their perceptions of the height and weight measurement process.  
420 Questions on this survey will assess teacher perceptions' of privacy, data accuracy, and student feelings of  
421 stigmatization. This survey will also ask about the location of height and weight measurements. An  
422 introductory paragraph will explain the purpose of the survey to teachers. We will ask teachers to complete  
423 this survey as soon as possible after conducting height and weight measurements.

## 424 **BMI Validation Study**

425 In Spring 2017, we will assess the validity of BMI measurements in 10 randomly-selected Group 1 schools and  
426 10 randomly-selected Group 2 schools. Since 6<sup>th</sup>, 7<sup>th</sup>, and 8<sup>th</sup> grade students are only present in two school  
427 types each (while 4<sup>th</sup> and 5<sup>th</sup> grade students are present in three school types each), we will oversample K-6  
428 and 6-8 schools to produce an even distribution of grades. Within each group, therefore, we will randomly  
429 select 2 K-8 schools, 2 K-5 schools, 3 K-6 schools, and 3 6-8 schools. We will randomly select two classrooms to  
430 measure per school, ensuring a balance across grades and selecting different teachers from each school.



431 Assuming an average of 25 students measured per class, we expect to measure 1,000 students in total. A  
432 member of our research team will travel to all schools to conduct the measurements under the guise that we  
433 are assessing percent body fat on a subset of students (our Tanita scale will be able to assess percent body fat).  
434 Once measures are completed, we will assess the accuracy of school staff measures (SD of difference), bias in  
435 measures, and variance in measures of school personnel versus researchers. While studies have shown that  
436 trained school staff can reliably measure BMI, concerns may be raised about the validity of school BMI  
437 measures if we find that BMI reporting has no impact on obesity. Results from this validation study will allow  
438 us to appropriately address such concerns.

#### 439 School Policies and Programs Survey

440 In Year 3, all schools will be asked to complete a survey regarding policies and programs related to nutrition  
441 and physical activity. Questions for this survey will be taken from the School Health Index and will cover the  
442 following topics: recess, food as a reward, access to drinking water, competitive foods and beverages, physical  
443 education, classroom activity breaks, and schools meals. Schools will be asked to involve multiple people (food  
444 services director, PE teacher, classroom teachers, etc.) in completing the survey when necessary. The purpose  
445 of this survey is to capture any schoolwide nutrition and physical activity practices that might interfere with  
446 our study's findings. Schools will receive a \$50 gift card for completing this survey.

#### 447 Data Provided by Schools

448 Following each assessment period, schools will provide our research team with students' height, weight, and  
449 fitness data using first and last names. As soon as our research team receives these data, the data will be  
450 entered into an Excel spreadsheet stored on our secure server. Height, weight, and aerobic capacity data will  
451 be entered twice and compared for accuracy. All documents containing student names and data will be stored  
452 in locked filing cabinets in our locked research office during the data entry period. They will be destroyed once  
453 all data have been entered and cleaned (likely three months after forms are received from schools).

454 School districts will provide date of birth, sex, race/ethnicity, and eligibility for free or reduced-price meals for  
455 all students participating in the study. School districts will also provide home addresses for all Group 1  
456 students (whose parents will receive a BMI report) and a subset of Group 2 and 3 students (whose parents will  
457 receive a survey) during Years 1-3. Lastly, school districts will provide phone numbers for the subset of parents  
458 who we select to participate in the parent interviews. We will clearly outline the data requirements in the  
459 MOU that school districts sign to participate in the study.

460

## 461 **STUDY INTERVENTION**

462 In September 2015 and 2016, we will mail BMI reports to Group 1 parents. These reports will provide the  
463 child's height, weight, BMI, and weight status classification. A bar graph will visually depict the child's  
464 placement along the spectrum of weight status classifications based on age and sex, ranging from the 1<sup>st</sup>  
465 percentile to the 99<sup>th</sup> percentile. When a student's BMI falls outside this range, the student's BMI will replace  
466 the value of the 1<sup>st</sup> or 99<sup>th</sup> percentile on the bar graph. The report will also provide several evidence-based  
467 nutrition and physical activity recommendations, as well as a recommendation that parents visit  
468 [www.choosemyplate.org](http://www.choosemyplate.org) for more physical activity and nutrition resources. We will use feedback obtained  
469 from parent focus groups to design these reports.

470

471 In August 2015, we will randomly assign students in grades 6-8 (who participated in the fitness assessments as  
472 5<sup>th</sup>-7<sup>th</sup> grade students during the previous spring) to receive one of the two letters: 1) BMI results only, or 2)  
473 BMI and fitness results. Letters that also provide fitness results will provide the student's fitness test scores, an

474 indicator of a “healthy” score for each test, and an interpretation of the student’s performance on each fitness  
475 test. Students in grades 4 and 5 will receive the report with BMI results only since they will not have  
476 participated in the fitness assessments during the previous spring. In September 2016, parents will receive the  
477 same report type that they received during Year 2. Parents of 6<sup>th</sup>-8<sup>th</sup> grade students who enrolled in the study  
478 during the 2015-16 school year will be randomly assigned to letter type.

479

480 We will hire a graphic design team to design the BMI reports and create an infographic with nutrition and  
481 physical activity messages. BMI reports will be printed using variable data printing, which allows template  
482 letters to be populated with each student’s data. We will hire an outside contractor to print BMI reports and  
483 prepare them for mailing. Reports will be sent via US mail and will be available in whatever languages districts  
484 typically use to send information home to parents.

485

## 486 **STUDY ANALYSES and POWER CALCULATIONS**

487 **Aim 1:** To prospectively determine the impact of school-based BMI screening and reporting on obesity and  
488 obesity disparities among approximately 16,000 students in grades 3-8.

### 489 Analyses

490 To determine the impact of BMI reporting on childhood obesity, we will use a mixed effects model with BMI z-  
491 score as the outcome and a group-by-time (Group 1 vs. Group 2) interaction term as the primary predictor.  
492 Students will be followed over three years. We will include random effects for district and school (to account  
493 for clustering of students) and student, and we will adjust for student-level race/ethnicity, sex, and grade, as  
494 well as for neighborhood socioeconomics. We expect the strongest effect of BMI reporting to be in youth with  
495 a BMI  $\geq$  85<sup>th</sup> percentile, whose parents will receive a BMI report stating that their child is at-risk-for overweight  
496 or overweight. Therefore, our primary analysis will be limited to the estimated 40% of students with a BMI  $\geq$   
497 85<sup>th</sup> percentile in 2015 or 2016. Our primary analysis will compare the average effect of BMI reporting in  
498 Groups 1a and 1b to the effect in Group 2. Because we hypothesize in Aim 2 that BMI-only reports may be  
499 more effective than BMI+fitness reports, we plan a subgroup analysis to compare change in BMI z-score  
500 between students in Group 1a (BMI-only reports) and students in Group 2.

501 To determine the impact of BMI reporting on childhood obesity disparities, we will employ a similar model, but  
502 will examine ethnicity (Latino vs. non-Latino) and race (African American, Asian, and Caucasian) as effect  
503 modifiers.

### 504 Power calculations

505 Based on our research with BMI screening and survey administration in schools, we anticipate having data on  
506 90% of enrolled students each year and estimate that 10% of students will leave their school annually. With  
507 these assumptions, we expect to have at least 2 years of BMI data on about 16,000 students in Groups 1 and 2,  
508 of whom we expect 6,440 will be overweight (primary analysis). Accounting for the loss of up to 1 school per  
509 group, we anticipate having 80% power to detect a difference in 1-year change in BMI z-score between groups  
510 of .017 BMI z-scores (two-sided alpha of 0.05). This is equivalent to an average difference in a 1-year change in  
511 weight of 0.35 pounds for a 10-year old with a BMI at the 90th percentile. We assume an SD for change in BMI  
512 z-score of 0.19 based on our preliminary data and a study among 10-14 year old Latino youth. For the planned  
513 subgroup analysis comparing Group 1a to Group 2, we are powered to detect a difference of 0.018 BMI z-  
514 scores. These calculations are adjusted for the cluster design, assuming an intra-class correlation (ICC) of  
515 0.0045 (between vs. within school differences in change in BMI z-score) based on our prior work. Power



516 calculations are based on 1-year change and are, therefore, conservative, as one-third of students will  
517 contribute 2-year change data as well.

518 **Aim 2:** To prospectively compare the impact of reporting BMI alone versus reporting BMI with fitness test  
519 results on obesity and fitness among 8,500 students in grades 3-8.

## 520 Analyses

521 We will compare 3-year trajectories of BMI and aerobic capacity between students in Group 1a (BMI-only  
522 report letter, n~1125) and Group 1b (BMI + fitness test results report letter, n~1125). To explore the  
523 mechanism of effect of the reports, we will compare parents' self-reported behaviors related to their child's  
524 diet and exercise by report format, with sub-analyses stratifying by the student's baseline weight status and  
525 baseline fitness status. Finally, we will compare parents' responses to questions about the utility of reports to  
526 see if one report format appears more favorable, with subgroup analyses by parent race/ethnicity.

527 We will use mixed effects models with BMI z-score or aerobic capacity (VO<sub>2</sub>max from the PACER, calculated  
528 using Leger's equation<sup>14</sup> as we have done previously<sup>15</sup>) as the outcome and a group-by-time interaction term  
529 as the primary predictor, with random effects for school, district, and student, adjusted for student  
530 demographics. We will limit our primary analysis to students with a BMI ≥ 85<sup>th</sup> percentile at baseline (n=2250).

## 531 Power Calculations

532 Based on assumptions above (*Aim 1, Power Calculations*), we will have 80% power to detect a difference in 1-  
533 year change in BMI z-score between report formats of 0.036 (two-sided alpha of 0.05), which is equivalent to a  
534 difference in weight gain between groups of approximately 0.4 pounds, for a 10-year old at the 90<sup>th</sup> BMI  
535 percentile. We will also run the models for all students, regardless of BMI percentile at baseline. Parents may  
536 make changes in the home in response to a child's poor fitness results even if BMI is normal; thus, BMI+fitness  
537 reports may impact fitness and BMI trajectory independent of baseline weight status.

538 **Aim 3:** *To determine the extent to which BMI screening and reporting have unintended consequences on*  
539 *weight-based stigmatization in approximately 20,000 students in grades 4-8.*

## 540 Analyses

541 We will compare changes over time in body satisfaction, exposure to stigmatizing comments, and unhealthy  
542 weight-control behaviors between students who are exposed to BMI screening and reporting (Group 1),  
543 students who are exposed to BMI screening only (Group 2), and students exposed to neither BMI screening  
544 nor reporting (Group 3). As in analyses for Aims 1 and 2, we will use a mixed-effects model with random  
545 effects for district and school, and a categorical (Group 1, 2 or 3) group-by-time variable as the primary  
546 predictor. Because we cannot link anonymous survey responses over time, we will increase our power to  
547 detect differences between groups by assigning students to clusters within schools, based on the student's  
548 grade, sex, and race-ethnicity (Latino; non-Latino Caucasian, African American, and Asian American; and Other).  
549 The mixed effect model will include a random effect for cluster, and will weight each cluster by the number of  
550 students it contains. We will use separate models for each of the 4 constructs of interest.

## 551 Power Calculations

552 On average, each school will have approximately 45 unique clusters (e.g., one cluster would be African-  
553 American boys in grade 4 in 2014 who are followed over time). With 25 schools per group, we can detect a  
554 standardized effect for each outcome of 0.16, assuming an ICC of 0.015, based on the average cross-sectional  
555 ICCs from statewide survey data on which we've published.<sup>16</sup> A standardized effect size of 0.16 means we can  
556 detect a difference between groups equivalent to 0.16 of the SD of the change in the measure – a very small

557 change in the distribution of responses, for all measures of interest. As an example, our measure of body  
558 satisfaction has a published mean score for boys of 37, with a range of 10-50, and cross-sectional SD of 8.7.<sup>17</sup>  
559 We estimate the SD for change as the cross-sectional SD\*SQRT[2\*(1-r)], where r is the assumed correlation  
560 between responses at time 1 and time 2. Assuming a moderate correlation (0.50), our estimated SD for change  
561 in scores is 8.7; therefore, with a standardized effect size of 0.16, we can detect a difference between groups  
562 in change of 1.5 points. This is again a conservative estimate of power as it is based on one-year change, but  
563 over half of the clusters of students will contribute 2- or 3-year change data as well.

564 **TIMELINE OF ACTIVITIES**

| Study activity                                   | Grades involved | Year 1                |      |     |     |     |      |     |     |     |     |     |     | Year 2                |      |     |     |     |     |      |     |     |     |     |     | Year 3                |      |     |     |     |     |     |     |     |     |     |  |  |
|--------------------------------------------------|-----------------|-----------------------|------|-----|-----|-----|------|-----|-----|-----|-----|-----|-----|-----------------------|------|-----|-----|-----|-----|------|-----|-----|-----|-----|-----|-----------------------|------|-----|-----|-----|-----|-----|-----|-----|-----|-----|--|--|
|                                                  |                 | Aug                   | Sept | Oct | Nov | Dec | Jan  | Feb | Mar | Apr | May | Jun | Jul | Aug                   | Sept | Oct | Nov | Dec | Jan | Feb  | Mar | Apr | May | Jun | Jul | Aug                   | Sept | Oct | Nov | Dec | Jan | Feb | Mar | Apr | May | Jun |  |  |
|                                                  |                 | 2014                  |      |     |     |     | 2015 |     |     |     |     |     |     | 2016                  |      |     |     |     |     | 2017 |     |     |     |     |     |                       |      |     |     |     |     |     |     |     |     |     |  |  |
|                                                  |                 | 2014-2015 school year |      |     |     |     |      |     |     |     |     |     |     | 2015-2016 school year |      |     |     |     |     |      |     |     |     |     |     | 2016-2017 school year |      |     |     |     |     |     |     |     |     |     |  |  |
| Distribution of unsigned parent permission forms | 3rd-7th         | X                     | X    |     |     |     | X    |     |     |     |     |     |     |                       | X    | X   |     |     |     |      |     |     |     |     |     | X                     | X    |     |     |     |     |     |     |     |     |     |  |  |
| Student survey                                   | 4th-8th         |                       | X    | X   | X   | X   |      |     |     |     |     |     |     |                       | X    | X   | X   |     |     |      |     |     |     |     |     |                       | X    | X   | X   |     |     |     |     |     |     |     |  |  |
| Key informant interview                          | N/A             |                       |      |     |     |     |      |     |     |     |     |     |     |                       |      |     |     |     |     |      | X   | X   |     |     |     |                       |      |     |     |     |     |     |     | X   | X   |     |  |  |
| School randomization                             | N/A             | X                     | X    | X   | X   | X   |      |     |     |     |     |     |     |                       |      |     |     |     |     |      |     |     |     |     |     |                       |      |     |     |     |     |     |     |     |     |     |  |  |
| Parent survey                                    | 3rd-8th         |                       |      |     |     |     |      |     |     | X   | X   |     |     |                       |      |     |     |     |     | X    | X   |     |     |     |     |                       |      |     |     |     |     |     |     |     |     |     |  |  |
| Obtain BMI waiver for control schools            | N/A             |                       |      | X   | X   | X   | X    |     |     |     |     |     |     |                       | X    | X   |     |     |     |      |     |     |     |     |     |                       |      |     |     |     |     |     |     |     |     |     |  |  |
| BMI measurement - Intervention schools           | 3rd-8th         |                       |      |     |     |     |      | X   | X   | X   |     |     |     |                       |      |     |     |     | X   | X    | X   |     |     |     |     |                       |      |     |     |     |     | X   | X   | X   |     |     |  |  |
| Teacher survey - intervention schools            | 3rd-8th         |                       |      |     |     |     |      | X   | X   | X   |     |     |     |                       |      |     |     |     | X   | X    | X   |     |     |     |     |                       |      |     |     |     | X   | X   | X   |     |     |     |  |  |
| BMI measurement - Control schools                | 4th-8th         |                       |      |     |     |     |      |     |     |     |     |     |     |                       |      |     |     |     |     |      |     |     |     |     |     |                       |      |     |     |     | X   | X   | X   |     |     |     |  |  |
| Teacher survey - Control schools                 | 4th-8th         |                       |      |     |     |     |      |     |     |     |     |     |     |                       |      |     |     |     |     |      |     |     |     |     |     |                       |      |     |     |     | X   | X   | X   |     |     |     |  |  |
| Fitness assessment - Intervention schools        | 5th-8th         |                       |      |     |     |     |      | X   | X   | X   |     |     |     |                       |      |     |     |     | X   | X    | X   |     |     |     |     |                       |      |     |     |     | X   | X   | X   |     |     |     |  |  |
| Fitness assessment - Control schools             | 5th & 7th       |                       |      |     |     |     |      | X   | X   | X   |     |     |     |                       |      |     |     |     | X   | X    | X   |     |     |     |     |                       |      |     |     |     | X   | X   | X   |     |     |     |  |  |
| BMI report sent to caregivers                    | 4th-8th         |                       |      |     |     |     |      |     |     |     |     |     |     |                       | X    | X   |     |     |     |      |     |     |     |     |     |                       | X    | X   |     |     |     |     |     |     |     |     |  |  |
| BMI reliability study                            | 3rd-8th         |                       |      |     |     |     |      |     |     |     |     |     |     |                       |      |     |     |     | X   | X    | X   |     |     |     |     |                       |      |     |     |     |     |     |     |     |     |     |  |  |

565

566

## 567 AMENDMENTS

568

569 Subsequent to the original Operations Manual, dated August 21, 2014, the following amendments to the study  
570 protocol were made, which appear in the final version dated July 11, 2017. Names of the schools and school  
571 districts have been redacted in this online version of the operations manual. Original documents are available  
572 upon request.

573

574 **Sample size: number of schools.** The original sample size was 75 schools. After wave one of enrollment in fall  
575 2014, the total number of students per school was slightly smaller than anticipated, so an additional 4 schools  
576 were recruited to the study in wave 2 (fall 2015) for a total of 79 schools.

577 **Number of school districts.** We had originally planned to recruit 6 school districts, but as of fall 2014 were only  
578 able to recruit 5 school districts.

579 **School-level eligibility.** We had originally planned to include schools with between 30% and 70% students of  
580 Hispanic ethnicity to allow us to stratify analyses based on ethnicity. However, there were fewer schools within  
581 this range than anticipated and we expanded eligibility to schools 15% to 85% Hispanic enrollment to meet  
582 enrollment targets while still allowing for stratified analyses by ethnicity.

583 **Student survey.** We had intended to ask a single question on the survey about how often the student was  
584 teased at school about their weight. On further discussion, we also included a question asking how often  
585 other children were teased at school about their weight, in order to capture weight-based teasing in general.

586 **Parent survey.** We originally intended to send one baseline and one follow-up survey to parents. However,  
587 because parent recall of BMI reports was lower than expected in the follow-up parent survey, we sent an  
588 additional round of follow-up surveys in the final year of the study to re-measure parent recall.

589 **BMI validation study.** We originally intended to compare BMI measurements between trained researchers and  
590 school staff in 4 schools, measuring 50 students per school. To increase our power to detect differences  
591 between school staff BMI measurements and researchers' measurements, we increased our sample size to 10  
592 schools with 100 students per school.

593

594

595 References

- 596 1. Braveman PA, Cubbin C, Egerter S, Williams DR, Pamuk E. Socioeconomic disparities in health in the  
597 United States: what the patterns tell us. *Am J Public Health*. Apr 1 2010;100 Suppl 1:S186-196.
- 598 2. National Research Council. Preventing Childhood Obesity: Health in the Balance. Koplan JP, Liverman CT,  
599 Kraak VI, eds. Washington (DC): The National Academies Press; 2005:269-270.
- 600 3. Nihiser AJ, Lee SM, Wechsler H, et al. Body mass index measurement in schools. *J Sch Health*. Dec  
601 2007;77(10):651-671; quiz 722-654.
- 602 4. Madsen KA. School-based body mass index screening and parent notification: a statewide natural  
603 experiment. *Arch Pediatr Adolesc Med*. Nov 2011;165(11):987-992.
- 604 5. Madsen KA, Linchey J. School-based BMI and body composition screening and parent notification in  
605 California: methods and messages. *J Sch Health*. Jun 2012;82(6):294-300.
- 606 6. Ikeda JP, Crawford PB, Woodward-Lopez G. BMI screening in schools: helpful or harmful. *Health Educ Res*.  
607 Dec 2006;21(6):761-769.
- 608 7. Cogan JC, Smith JP, Maine MD. The risks of a quick fix: a case against mandatory body mass index  
609 reporting laws. *Eat Disord*. Jan-Feb 2008;16(1):2-13.
- 610 8. Crawford P, Hinson J, Madsen K, Neumark-Sztainer D, Nihiser A. An Update on the Use and Value of  
611 School BMI Screening, Surveillance, and Reporting. *Childhood Obesity*. 2012;7(6):441-449.
- 612 9. Portilla MG. Body mass index reporting through the school system: potential harm. *J Am Diet Assoc*. Mar  
613 2011;111(3):442-445.
- 614 10. Grimmett C, Croker H, Carnell S, Wardle J. Telling parents their child's weight status: psychological impact  
615 of a weight-screening program. *Pediatrics*. Sep 2008;122(3):e682-688.
- 616 11. Kaczmarek JM, DeBate RD, Marhefka SL, Daley EM. State-mandated school-based BMI screening and  
617 parent notification: a descriptive case study. *Health Promot Pract*. Nov 2011;12(6):797-801.
- 618 12. Chomitz VR, Collins J, Kim J, Kramer E, McGowan R. Promoting healthy weight among elementary school  
619 children via a health report card approach. *Arch Pediatr Adolesc Med*. Aug 2003;157(8):765-772.
- 620 13. Kalich KA, Chomitz V, Peterson KE, McGowan R, Houser RF, Must A. Comfort and utility of school-based  
621 weight screening: the student perspective. *BMC Pediatr*. 2008;8:9.
- 622 14. Leger LA, Mercier D, Gadoury C, Lambert J. The multistage 20 metre shuttle run test for aerobic fitness. *J*  
623 *Sports Sci*. Summer 1988;6(2):93-101.
- 624 15. Herrick H, Thompson H, Kinder J, Madsen KA. Use of SPARK to Promote After-School Physical Activity. *J*  
625 *Sch Health*. Oct 2012;82(10):457-461.
- 626 16. Madsen KA, Hicks K, Thompson H. Physical activity and positive youth development: impact of a school-  
627 based program. *J Sch Health*. Aug 2011;81(8):462-470.
- 628 17. Neumark-Sztainer D, Paxton SJ, Hannan PJ, Haines J, Story M. Does body satisfaction matter? Five-year  
629 longitudinal associations between body satisfaction and health behaviors in adolescent females and  
630 males. *J Adolesc Health*. Aug 2006;39(2):244-251.
- 631
