# Supplementary material
Source: PubMed Central journal article supplement (PMC7670394)
Supplement: jamapediatr-e204768-s003.pdf [file jamapediatr-e204768-s003.pdf]

## Data Sharing Statement

Madsen. Effect of School-Based Body Mass Index Reporting in California Public Schools. *JAMA Pediatr*. Published November 16, 2020. 10.1001/jamapediatrics.2020.4768

### Data

**Data available:** Yes

**Data types:** Deidentified participant data, Data dictionary

**How to access data:** [madsenk@berkeley.edu](mailto:madsenk@berkeley.edu)

**When available:** With publication

### Supporting Documents

**Document types:** None

### Additional Information

**Who can access the data:** Because parents of study participants were told that only the research team would have access to the data, any researcher desiring access to the data will need to sign a data use agreement, covering the following elements (per our IRB): 1. What the research questions are 2. What data elements are being requested 3. Who will have access to the data 4. What data security measures are/will be in place

**Types of analyses:** The data will be available for any purpose.

**Mechanisms of data availability:** Data will be available with a signed data use agreement.
